1 **Characterization of consensus operator site for *Streptococcus pneumoniae* copper**  
2 **repressor, CopY**

3  
4 Henrik O'Brien<sup>1\*</sup>, Joseph W. Alvin<sup>1\*</sup>, Sanjay V. Menghani<sup>1</sup>, Koenraad Van Doorslaer<sup>1,2,3</sup>, and  
5 Michael D. L. Johnson<sup>1,2,4</sup>

6  
7 <sup>1</sup>Department of Immunobiology  
8 University of Arizona  
9 Tucson, AZ

10 <sup>2</sup>BIO5 Institute  
11 University of Arizona  
12 Tucson, AZ

13 <sup>3</sup>School of Animal and Comparative Biomedical Sciences, Cancer Biology Graduate  
14 Interdisciplinary Program, Genetics Graduate Interdisciplinary Program, and University of  
15 Arizona Cancer Center  
16 University of Arizona

17 Tucson, AZ  
18 <sup>4</sup>Valley Fever Center for Excellence

19 University of Arizona  
20 Tucson, AZ

21  
22 \* These authors contributed equally to this work

23  
24 Corresponding Author: Michael D. L. Johnson  
25 University of Arizona  
26 1656 E. Mabel St. / P.O. Box 245221 / MRB 221 (office)  
27 Tucson, AZ 85724  
28 Tel: 520-626-3779 / Fax: 520-626-2100

29 **ABSTRACT**

30 Copper is broadly toxic to bacteria. As such, bacteria have evolved specialized copper export  
31 systems (*cop* operons) often consisting of a DNA-binding/copper-responsive regulator (which  
32 can be a repressor or activator), a copper chaperone, and a copper exporter. For those bacteria  
33 using DNA-binding copper repressors, few studies have examined the regulation of this operon  
34 regarding the operator DNA sequence needed for repression. In *Streptococcus pneumoniae*  
35 (the pneumococcus), CopY is the copper repressor for the *cop* operon. Previously, these  
36 homologs have been characterized to bind a 10-base consensus sequence T/GACAnnTGTA.  
37 Here, we bioinformatically and empirically characterize these operator sites across species  
38 using *S. pneumoniae* CopY as a guide for binding. By examining the 21-base repeat operators  
39 for the pneumococcal *cop* operon and comparing binding of recombinant CopY to this, and the  
40 operator sites found in *Enterococcus hirae*, we show using biolayer interferometry that the  
41 T/GACAnnTGTA sequence is essential to binding, but it is not sufficient. We determine a more  
42 comprehensive *S. pneumoniae* CopY operator sequence to be RnYKACAAATGTARnY (where  
43 “R” is purine, “Y” is pyrimidine, and “K” is either G or T) binding with an affinity of 28 nM. We  
44 further propose that the *cop* operon operator consensus site of pneumococcal homologs be  
45 RnYKACAnnYGTARnY. This study illustrates the necessity to explore bacterial operator sites  
46 further to better understand bacterial gene regulation.

47

## 48 INTRODUCTION

49 Metals are essential nutrients to all living organisms. They are used as co-factors and  
50 structural components in a vast number of cellular processes. Iron, and manganese are  
51 examples of first-row divalent transition metals used by living organisms. Properties such as  
52 ability to form stable complexes play a vital role as to how each metal is used in the organism.  
53 The stability of biological complexes is characterized by the Irving-Williams series ( $Mn < Fe <$   
54  $Co < Ni < Cu > Zn$ ) (1). In general, more stable complexes correlate to a metal's toxicity, as  
55 native metals for an active site can be displaced by another metal ion further along in the  
56 observed series. This process is known as mismetallation and is primarily due to the promiscuity  
57 of different metal binding motifs (2). Higher order organisms have evolved ways to tightly  
58 regulate and use these metals, thus reducing some promiscuity in displacement. For most  
59 prokaryotes, however, metals like copper, nickel, and cobalt are broadly toxic. Within  
60 mammalian systems, copper is the most utilized and biologically relevant of these three metals  
61 (3-7). As such, in a process called nutritional immunity, mammalian hosts have evolved  
62 strategies to both sequester the universally necessary metals from bacteria (e.g., Fe, Mn, Ca)  
63 and bombard them with toxic metals such as copper and zinc (8, 9). Although Fenton chemistry  
64 mediated toxicity can occur in bacteria, the majority of copper-specific toxicity has been  
65 observed via mismetallation with iron-sulfur clusters, nucleotide synthesis, and glutamate  
66 synthesis (10-14).

67 Bacteria have evolved specialized import and export systems to acquire necessary  
68 metals and to adapt to metal toxicity. The presence of these import and export systems within  
69 the bacteria is usually based on need for the metal. Iron, for instance, is an essential metal for  
70 *Streptococcus pneumoniae* (the pneumococcus), a Gram-positive pathogen that causes  
71 pneumonia, meningitis, otitis media, and septicemia. In *S. pneumoniae*, iron has four known  
72 import systems, Pia, Piu, Pit, and the hemin binding system encoded by *SPD\_1590* (D39  
73 strain), but no known export systems (15, 16). Whereas calcium, zinc, and manganese all have

74 export and import systems, the pneumococcus has no known import system for copper but  
75 contains a dedicated copper export system encoded by the *cop* operon (16-21). In general,  
76 Gram-positive, and some Gram-negative bacterial copper export systems consist of a *cop*  
77 operon regulator, a copper chaperone, and one or two copper exporters (17, 22-28). Mutations  
78 in the copper export protein in *cop* operons result in decreased bacterial virulence, highlighting  
79 the importance of nutritional immunity and copper toxicity in *S. pneumoniae* (17, 27, 29, 30).

80 The *cop* operon regulators function as either activators or repressors. Although there are  
81 *cop* operon activators and repressors in structurally distinct groups, they all serve to protect the  
82 bacteria against copper stress by sensing copper and facilitating its export. Activators are  
83 proteins that sense copper and activate gene expression in response, such as CueR in  
84 *Escherichia coli* (31). Occurring in species such as *Lactococcus lactis* and *S. pneumoniae*  
85 (CopR/Y), and in *Listeria monocytogenes* and *Mycobacterium tuberculosis* (CsoR), the *cop*  
86 operon repressors remain bound to DNA in environments lacking copper stress to block  
87 transcription, and release DNA upon binding copper (16, 24, 27, 32-34).

88 The CopR/Y family of *cop* operon repressors have consensus copper binding protein  
89 motifs, Cys-X-Cys. Each CxC motif (or CxxC) can bind in a 1:1 ratio with copper. These motifs  
90 can also bind zinc with a stoichiometry of two CxC motifs needed to bind one zinc (33). Copper  
91 binding causes a conformational change in the copper repressor leading to the DNA-binding  
92 release of what was thought to be the full *cop* operon operator, T/GACAnnTGTA (where n  
93 represents any nucleotide), while zinc binding leads to tighter *cop* operon operator binding (32,  
94 33). However, the atomic and protein structural detail of how binding metal directly leads to the  
95 conformational changes associated with DNA binding is currently unknown.

96 Multiple studies regarding the *cop* operon have been performed in *S. pneumoniae* (11,  
97 17, 27, 32, 33, 35, 36). The pneumococcal *cop* operon contains, *copY* as the repressor, *cupA*  
98 as a membrane-associated copper chaperone, and *copA* as the copper-specific exporter (16,  
99 27, 32). Although the affinities of CopY/R family repressors for copper are generally high, the

100 pneumococcal chaperone CupA is able to chelate copper from CopY, reduce it from Cu<sup>2+</sup> to  
101 Cu<sup>1+</sup>, and transport copper to CopA for export (32, 35-37). CupA copper chelation allows for the  
102 recycling of CopY and its apo- or zinc-bound form to return to the *cop* operator to repress the  
103 operon. Pneumococcal CopY is homologous to several known antibiotic resistance repressors  
104 including Blal, a *Staphylococcus aureus* Mecl homolog that represses the gene for a β-  
105 lactamase (32, 33, 38). Like CopY, Blal and Mecl interact with a known operator sequence,  
106 TACA/TGTA, form a homodimer, and are mostly helical in secondary structure (32, 38).  
107 However, unlike CopY, Blal does not have a known metal binding site and is regulated by  
108 proteases (39).

109         Here, we present bioinformatic data on the homology of *cop* operon operators and DNA-  
110 binding assays using recombinant pneumococcal CopY to characterize binding to the *cop*  
111 operon operator. We determined the consensus pneumococcal operator site, that  
112 pneumococcal CopY can bind to both operators relatively equally and independently, and that  
113 species with CopY homologs contain either one or two consensus operators but that species  
114 with two sites do not always have identical repeats.

## 115 **MATERIALS AND METHODS**

### 116 **Aligning and Comparing CopY homologs and promoter sequences**

117 The BLAST sequence alignment algorithm was used to align both *E. hirae* and TIGR4 *S.*  
118 *pneumoniae cop* operon promoter regions, the 21-base repeats upstream of the TIGR4  
119 pneumococcal *cop* operon, and the promoter regions of pneumococcal species (40). A set of  
120 custom Python scripts (available from [https://github.com/Van-Doorslaer/Alvin\\_et\\_al\\_2018](https://github.com/Van-Doorslaer/Alvin_et_al_2018)) were  
121 used to assign identified *copY* homologs to bacterial genomes and extract the suspected  
122 regulatory region from individual species (100 bases upstream of the start codon). Importantly,  
123 in many cases, the initial blast search identified CopY homologs which matched multiple  
124 species' isolates/strains. In this case, the identified proteins were again compared to the NCBI  
125 database, and the homolog with the lowest E-value was retained. The identified CopY homolog  
126 was not necessarily identical to the original query. If this approach was unsuccessful, the  
127 homolog was excluded from further analysis.

128

### 129 **Protein purification**

130 CopY protein was purified as in Neubert et. al.(32), with modifications. The pMCSG7 vector  
131 includes an N-terminal 6x-His tag linked to CopY via a Tobacco Etch Virus protease (TEV)  
132 cleavage site(41). Unless specified, all steps were performed on ice or at 4 °C. After initial  
133 purification using immobilized metal-affinity chromatography (IMAC) (HisTrap FF, GE  
134 Healthcare), the crude CopY sample was incubated at 23 °C with a 100:1 mass ratio of  
135 recombinant TEV. The cleaved CopY was purified with subtractive IMAC (our TEV protease  
136 contains a C-terminal His tag). The flow-through was further purified by size-exclusion  
137 chromatography (SEC) (Superdex 200, GE Healthcare) using a buffer of 20 mM Tris pH 8, 200  
138 mM NaCl, 1 mM tris(2-carboxyethyl)phosphine (TCEP). Peaks containing pure CopY (as  
139 determined by SDS-PAGE) were pooled and concentration was determined by absorbance at

140 280 nm. Samples were used immediately or protected with 35-50% glycerol and aliquoted into  
141 thin-walled PCR tubes containing 30  $\mu$ L. These aliquots were then flash-frozen using liquid N<sub>2</sub>.

142

### 143 **Electromobility Shift Assay (EMSA)**

144 Primers for binding, 5'-

145 TAATTGACAAATGTAGATTTTAAGAGTATACTGATGAGTGTAATTGACAAATGTAGATTTT -3'

146 and 5' –

147 AAAATCTACATTTGTCAATTACACTCATCAGTATACTCTTAAAATCTACATTTGTCAATTA –

148 3', were annealed by heating a 1:1 molar equivalent of each strand to 95°C, then reducing the

149 temperature by ~1°C/minute to 22°C. EMSA buffer was Tris-borate (TB) electrophoresis buffer

150 (EDTA was left out to diminish metal chelation). Samples were incubated at 4°C for 5 minutes,

151 loaded onto a 5% polyacrylamideTBE gel (Bio-Rad) that had been pre-run for 15 minutes in TB

152 Buffer. Samples were electrophoresed at 40 V for 120 minutes. The polyacrylamide gel was

153 stained with 0.02% ethidium bromide (Amresco) and imaged a Gel Doc XR+ System (Bio-Rad).

154

### 155 **Octet DNA/protein binding**

156 Double stranded DNA fragments were prepared by incubating a 5' biotinylated ssDNA with a

157 complementary strand at 95 °C for 5-10 minutes then left on benchtop to cool to room

158 temperature (Table S1). The dissociation constant for CopY with various DNA fragments was

159 determined using an Octet Red384 (Pall ForteBio). Streptavidin biosensors (Pall ForteBio) were

160 hydrated at 26 °C using the Sidekick shaker accessory for 10 min at 1000 rpm. Biotinylated

161 DNA fragments were diluted to 250 or 50 nM, depending on the levels of biosensor loading, in

162 the assay buffer (50 mM Tris pH 7.4, 150 mM NaCl, 4% glycerol, 1 mM TCEP, 1 mM NaN<sub>3</sub>,

163 0.1% Bovine Serum Albumin (BSA). During initial optimization, we observed significant non-

164 specific binding of CopY to the biosensors in the absence of BSA. The inclusion of 0.1% BSA

165 eliminated signals of nonspecific CopY binding at the highest concentrations used in the assay

166 (3  $\mu\text{M}$ ). Hydrated sensors were incubated in the assay buffer to acquire a primary baseline. The  
167 sensors were then loaded with biotinylated dsDNA, followed by a secondary baseline  
168 measurement using wells with buffer solution. DNA-loaded biosensors were then moved to  
169 wells containing varying CopY concentrations to measure association then placed back into  
170 assay buffer for dissociation recordings. All experiments were maintained at 26 °C with shaking  
171 at 1000 rpm. The optimized protocol was as follows: 1° baseline 60 s, DNA loading 300 s, 2°  
172 baseline 180 s, association 180 s, and dissociation 270 s. The methods were optimized to  
173 minimize sharp association peaks and minimize recording at equilibria.  
174 Analysis was performed using the Octet software. We applied a 1:1 (for dsDNA including one  
175 site) binding model using a global fit to biosensor replicates at each concentration of CopY.  
176 During pre-processing, an average of the 2° baseline across the various biosensors was  
177 applied, as well as Savitzky-Golay filtering to reduce noise. The data were inter-step corrected  
178 using an alignment to the dissociation step. Data were modeled using combined fits of  $k_a$  and  $k_d$   
179 values across independent replicates. Final estimates for  $K_d$  and related statistics were taken  
180 from the kinetic analysis.  
181 Rate constants for each sample were determined using the Octet analysis software as follows.  
182 For all 1:1 stoichiometric modelling, complex formation was evaluated as pseudo-first-order  
183 kinetics. The observed rate constant ( $k_{obs}$ ) was calculated according to the equation  $Y = Y_0 +$   
184  $A(1 - e^{-k_{obs} \times t})$ . Where  $Y_0$  = initial binding,  $Y$  = level of binding,  $t$  = time, and  $A$  = asymptote value  
185 at max response. Dissociation rate ( $k_d$ ) was calculated according to the equation  $Y = Y_0 +$   
186  $Ae^{-k_d \times t}$ . The calculated  $k_{obs}$  and  $k_d$  values were then used to determine  $k_a$  using the equation  
187  $k_a = \frac{k_{obs} - k_d}{[CopY]}$ . Finally, the dissociation constant ( $K_D$ ) was determined by the identity  $K_D = \frac{k_d}{k_a}$ .



## 188 RESULTS

### 189 ***cop* operator homology and frequency**

190 Early DNA-binding studies were carried out using a CopY homolog from *Enterococcus*  
191 *hirae* on the interactions with the *cop* operon operator (22, 42, 43). We recently observed that  
192 there are two large repeats upstream of the pneumococcal *cop* operon that include a 10-base  
193 sequence important for CopY binding. These motifs differed slightly from those observed in *E.*  
194 *hirae* (Figure 1A). Although the amino acid sequence of the *E. hirae* copper repressor and the  
195 upstream binding repeats are highly similar to *S. pneumoniae* (32, 33), and contain the 10-base  
196 sequence, *E. hirae* operators upon initial observation lacked the extended regions flanking this  
197 sequence in pneumococcus (Figure 1B) (22). A BLAST search revealed that the 61-base  
198 stretch of DNA upstream of the pneumococcal *cop* operon that includes the two extended 21-  
199 base repeats is highly conserved in all pneumococcal species (40). Related searches identified  
200 that some bacterial species only contain a single operator upstream of their respective *cop*  
201 operons. DNA-binding studies for the *cop* operon operator and CopY/R (including homologs)  
202 have not been performed for two identical operators to determine *in vitro* affinity values with the  
203 closest being Portmann et. al (42).

204 We performed BLASTp searches for *S. pneumoniae* TIGR4 CopY homologs first  
205 excluding, then specific to the *Streptococcus* genus (40). Using a max target sequence number  
206 of 1000 for each search, then combining both lists, we found 335 different entries (Table S2).  
207 From this list, we extracted protein sequences from the unique NCBI accession numbers (many  
208 NCBI accession numbers represented several/identical species) and then, the 100 bases  
209 upstream of the respective copper repressor start codon (Table S3, S4). Many of the 141  
210 unique protein sequences belonged to species in the *Streptococcus* and *Lactobacillus* genera  
211 (Table S3). This table also included species such as the yogurt probiotic *Lactobacillus*  
212 *acidophilus* and *Mycobacteroides abscessus*, an emerging multidrug resistant pathogen that  
213 causes lung, skin, and soft tissue infections) (44).

214 We used programs within the MEME suite to identify DNA repeats within a 100-base  
215 upstream fragment, which would correspond to promoter and suspected operator-containing  
216 regions from 88 unique sequences (45, 46). As predicted by known CopY/R operators, the  
217 dominant 21-base sequence contained T/GACAnnTGTA (hereafter KACAnnTGTA) (Figure 2A)  
218 (47). Of these 88 sequences, 67 had two CopY/R *cop* operon operators such as TIGR4,  
219 *Streptococcus pyogenes*, *E. hirae*, and *Enterococcus faecium*, 14 had one *cop* operon operator  
220 such as *Enterococcus faecalis*, and 7 had none with no other consensus sequence found  
221 (Figures 2B-D, Tables S5-S7). Increasing the bases upstream maximum to 500 did not yield  
222 additional sequences (data not shown). For the genomes with two *cop* operators, we found that  
223 most of the operators were between 24 and 39 bases from each other with the mode being 26  
224 bases (Figure S1). Of the species that had a single *cop* operon operator, the consensus  
225 sequences were more variable KACAnnYGTA (Table S6). Of these 14 sequences, 7 were on  
226 the positive strand (but six were palindromic) and 7 non-palindromic sequences were on the  
227 negative strand (Table S6).

228 With the sequences that had no consensus *cop* operon operators for CopY/R, six were  
229 in the *Lactobacillus* genus and one in the *Macrococcus* genus (Table S7). For these seven  
230 strains that had no consensus *cop* operon operator, MEME suite did not identify a consensus  
231 sequences consistent across those seven strains. A BLAST search also found no significant  
232 similarity between the DNA fragments. Additionally, a separate, *in silico* search of these  
233 operators did not yield a consensus sequence consistent between the strains.

234

### 235 **CopY binds to both *cop* operators**

236 Previous studies showed that CopY specifically bound to the *cop* operon operator in a  
237 sequence and metal specific manner as disrupting the operator bases or adding copper  
238 disrupted CopY binding, while adding manganese or iron had no detectable effect (32). These  
239 studies were done with only one full operator intact (32, 33). Thus, using an electric mobility shift

240 assay (EMSA), we qualitatively tested CopY binding to DNA to the two-operator 61-base dsDNA  
241 fragment. As evaluated by EMSA, CopY bound in a dose-dependent manner (Figure 3).  
242 Consistent with having two different *cop* operon operators, titrating CopY with the two-operator  
243 DNA showed two distinct shifts via EMSA (Figure 3).

244 To quantitatively determine affinities to one or both operators, we used biotinylated DNA  
245 oligos and recombinant CopY protein using biolayer interferometry (BLI). All BLI binding  
246 experiments are done with dsDNA unless otherwise noted. These experiments demonstrated  
247 that the two-site DNA had a similar affinity ( $K_d = 28.1$  nM) to the proximal DNA (DNA that has  
248 the distal site scrambled) ( $K_d = 25.5$  nM) (Table 1, Figure 4 A, B). The distal site DNA (DNA that  
249 has the proximal site scrambled) had a slightly lower affinity ( $K_d = 55.2$  nM) (Table 1, Figure 4B).  
250 However, a 2-fold change in affinity is within the error of the machine, thus indicating that all  
251 sites bind similarly and independently of each other. Further, this 2-fold difference could be  
252 attributed to the biotin tag on the 5' end of the DNA slightly interfering with binding. Given the  
253 comparable affinities, it is likely that binding at each operator is non-cooperative—i.e., CopY  
254 dimers do not appear to have quaternary. As expected, CopY bound DNA constructs containing  
255 intact 21-base repeat containing *cop* operon operators with significantly higher affinities  
256 compared to a scrambled DNA negative control (scram) or a ssDNA containing the two-site  
257 operator which both exhibited extremely weak binding (Figure 4D, data not shown). Taken  
258 together, CopY binds both 21-base repeats containing the operator sites independently of each  
259 other with nanomolar affinity.

260

### 261 **Determining a consensus CopY-family operator**

262 With a reported consensus binding sequence of KACAnnTGTA on the leading strand,  
263 we hypothesized that CopY may also bind other similar sequences as previously seen in  
264 *Lactococcus lactis* (48). Allowing for one base variation from the reported binding sequence, we  
265 found matches upstream of genes upregulated under copper stress and hypothesized that they

266 may also be regulated by CopY (11, 49). Seven potential binding sites were assessed using  
267 BLI. To our surprise, CopY did not bind to any of the fragments (Figure 5, Table 2, S2).

268         Based on this result we suspected that the reported consensus sequence in the  
269 literature may be necessary, but not sufficient for CopY binding. For this experiment, we took a  
270 scrambled negative control DNA and added back only the known 10-base consensus sequence  
271 to where it exists in the second operator site. We found that CopY did not bind this fragment  
272 above the level of our negative controls (Figure 6A). Taken together, these and with prior data,  
273 we have concluded that the reported consensus binding operator is necessary, but not sufficient  
274 for binding (22).

275         We next wanted to establish which bases outside of the previously reported 10-base  
276 consensus sequence were necessary for CopY binding. Using the proximal 21-base motif as a  
277 model, two fragments were generated: one containing the five bases upstream and another  
278 containing six bases downstream of the sequence. Neither of these fragments showed notable  
279 binding above that of the scrambled constructs suggesting that there are important bases on  
280 both sides of the 10-base sequence (Figure 6B). Next, two new constructs were tested to  
281 assess binding; one had the 10-base consensus sequence + two bases upstream and  
282 downstream for a total of 14 bases out of the full 21-base motif, and one had the 10-base  
283 consensus site + three bases to each side of the consensus was created for a total length of 16  
284 bases out of the full 21-base motif. The 14-base sequence did not display binding above that of  
285 negative controls ( $K_d > 3 \mu\text{M}$ ), but the 16-base sequence displayed binding (Figure 6C, S3,  
286 Table 1). While these 16-base DNA had a ~10-fold lower binding affinity than the full 21-base  
287 site, these levels of binding suggest that the 16 bases make up the core operator site  
288 recognized by CopY and additional bases increase affinity at the site. Extending the sequence  
289 to 19 of the 21 bases led to comparable levels of binding to the full sequence (Figure 6D).

290         Taking into account 1) our results for adding three bases on each side of the 10-base  
291 reported sequence in pneumococcus, 2) looking externally of the 10-base fragments in *L. lactis*

292 that it was predicted the repressor would bind to (with some binding and some not binding), and  
293 3) analyzing the alignment of bacterial species operator sites via Meme Suite (Figs. 1A, 2A,  
294 Table S5) a clear pyrimidine-n-purine motif on each side of the 10-base sequence was revealed  
295 to be RnYKACAnnTGTARnY (where “R” is purine, “Y” is pyrimidine, and “K” is either G or T)  
296 (48).

297 The initial characterization of the *cop* operon operator site occurred using the *E. hirae*  
298 genome (22, 50). Thus, to gather more details on the consensus pneumococcal CopY operator  
299 site, and test this extended operator hypothesis, we used *E. hirae* DNA with the distal or  
300 proximal operators intact and examined it for pneumococcal CopY binding. The *E. hirae* DNA  
301 had several differences to test the new operator hypothesis; 1) the *E. hirae* DNA sites have a  
302 “T” instead of the G found in *S. pneumoniae* in the initial 10 base consensus operator and this is  
303 notated as “K”; 2) the middle bases of the 10-base sequence, previously notated as “n”, are the  
304 same in the distal site (“AA”), but “GT” in the proximal site; and 3) both had three of the four  
305 bases of our proposed extended consensus being (RnYKACAnnTGTARnY) the opposite purine  
306 or pyrimidine base as compared to pneumococcus (Figure 1B). Pneumococcal CopY bound to  
307 the distal site implying that the predictions of “K” in the previous 10-base consensus operator  
308 and the three changed purines and pyrimidine were correct (Figure 7A). However,  
309 pneumococcal CopY did not bind to the proximal site implying that the “AA” notated as “nn” in  
310 the previous 10-base consensus sequence indeed needed to be “AA” (Figure 7B).

311 Lastly, we tested our hypothesis that it is a pyrimidine or purine in the given positions 1,  
312 3, 14, and 16, and not the specific base that matters by mutating the pyrimidine T at position 3  
313 (ATTGACAAATGTAGAT), to C (pyrimidine) and to A (purine) in the 19-base DNA fragment. We  
314 used the 19-base fragment versus the 16-base fragment here to better detect changes in  
315 binding affinity between the samples. Of the four bases outside of the 10-base consensus  
316 sequence that we made predictions for, the pyrimidine at position 3 is the only base that was the  
317 same in the *E. hirae* DNA fragment. As expected within our model, the T to C mutation did not

318 significantly alter the binding affinity as compared to the 19-base fragment, while the T to A  
319 mutation completely abolished binding (Figure 7C, D). Taken together, we believe the  
320 pneumococcal consensus operator is RnYKACAAATGTARnY as opposed to the previously  
321 reported KACAnnTGTA (Figure 8).  
322

## 323 DISCUSSION

324 Here, we populated a list of pneumococcal CopY homologs, assessed them for the  
325 number of upstream operators, determined the affinity of pneumococcal CopY for each of its  
326 two operators, and elucidated the complete sequence of the pneumococcal *cop* operon operator  
327 (RnYKACAAATGTARnY) which is greatly expanded from the previously reported  
328 KACAnnTGTA (Figure 8). As expected from the homology of the *cop* operon repressors, we  
329 observed binding of one species' repressor to the DNA of another, but this binding was not  
330 absolute as pneumococcal CopY bound to only one of the *E. hirae* sites.

331 Given the previous 10-base consensus sequence, it was plausible to propose that like in  
332 *L. lactis*, there were additional binding sites that the *cop* repressor could bind. Furthering the  
333 biological relevance of this proposition was that some sequences in *S. pneumoniae*  
334 corresponded to putative promoter regions of genes and operons upregulated under copper  
335 stress, thus implying that CopY was a master regulator of several operons under copper stress  
336 (11). By showing no binding of these sequences that followed the 10-base consensus, and the  
337 10-base sequence itself, we demonstrated that the 10-base sequence was not sufficient for  
338 binding. This fact ultimately led us to searching for and deriving the pneumococcal consensus  
339 sequence. Given this new pneumococcal consensus sequence, a new search in multiple  
340 *Streptococcal* species for potential operators yielded no additional sites (49). However, as in the  
341 *L. lactis* CopR binding to multiple operators in its genome, this is likely not the case with all  
342 bacteria containing CopY homologs (48).

343 In generating the list of CopY/R genes and proteins, we also were able to look upstream  
344 of the gene and compile what we believe to be a general consensus operator site which differs  
345 slightly from the newly proposed pneumococcal version. The two changes from the  
346 pneumococcal operator we propose are 1) returning to the "nn" in the middle of the previous 10-  
347 base consensus sequence and 2) changing base 10 from "T" to "Y" based on having T or C in  
348 the meme suite alignment. These changes yield what we propose to be the new consensus *cop*

349 operon operator “RnYKACAnnYGTARnY” (Figure 8). This new consensus operator was able to  
350 explain why CopY bound a subset of our tested sites. Furthermore, the model also explains the  
351 results presented by Magnani *et. al.* using the *L. lactis* CopR protein (Table 2) (48). As such,  
352 consensus operator sequences for various repressors should be revisited to better reveal  
353 potential binding interactions within their respective genomes.

354 Previous studies characterizing pneumococcal CopY were carried out with DNA  
355 containing only one intact operator (17, 32, 33). However, we show that *Streptococcus* and  
356 many other genera have two binding sites upstream of the *cop* operon. In some cases (e.g.,  
357 *Streptococcus*), these sites are identical, while other sites have slight sequence variation (e.g.,  
358 *E. hirae*) (Figure 1A). Despite having two identical 21-base repeat operators, the *S. pneumoniae*  
359 *cop* operon two-operator DNA does not have tighter binding to CopY as compared to the  
360 proximal or distal operator. This result is contrary to what was expected as more DNA-binding  
361 sites in sequence tend to increase overall protein affinity for those sites of regulation. While it is  
362 clear that CopY does not need a second operator present to bind DNA, this result does not  
363 necessarily rule out that *cop* operons with two operators is more tightly regulated than if only  
364 one operator was present.

365 Regarding how stringently the *cop* operon is controlled, we propose that the two  
366 pneumococcal operators do indeed serve to add additional restraint to *cop* operon transcription.  
367 We hypothesize that the two pneumococcal operators do indeed serve to add additional  
368 restraint to *cop* operon transcription. We also suggest that the distal operator prevents sigma  
369 factors from binding at the *copY* -35 element. and the proximal operator occludes RNA  
370 polymerase; establishing two layers of repression for the *cop* operon (51). This reasoning is also  
371 consistent to the proposed hypothesis of why there are two operators in the antibiotic resistance  
372 repressor Blal (52). These hypothesizes are the subject of our group’s ongoing research. Still,  
373 *S. pneumoniae* with its two CopY operators and with multiple levels of regulation comes as a  
374 surprise for an operon in which A) upregulation is linked to increased pneumococcal survival in



375 the host and B)  $\Delta copY$  mutant has increased virulence in mice (27, 53). We anticipate that  
376 further study of these systems in *S. pneumoniae* will yield clues as to the competitive  
377 advantages or selective pressures of the *cop* operon in its pathological context.

378

379

#### 380 **CONFLICTS OF INTEREST**

381 There are no conflicts to declare.

382

#### 383 **ACKNOWLEDGEMENTS**

384 The authors would like to thank Rachel Wong, the University of Arizona Functional Genomics  
385 Core Facility, and Richard Yip for assistance and support using the Octet Red384. This work  
386 was funded by an NIGMS grant 1R35128653 (MDLJ).

387 **FIGURE LEGENDS**

388 **Table 1. Data and model statistics from Octet kinetic experiments.** Listed dsDNA fragments  
389 and conditions were used with streptavidin probes and tested with recombinant CopY protein.

390

391 **Table 2. Outcomes of CopR or CopY binding to potential operator sites from *L. lactis***  
392 **(Magnani et al., 2008) or *S. pneumoniae* respectively.** Red bases indicate bases varying  
393 from the reported 10-base consensus sequence.

394

395 **Figure 1. TIGR4 has two 21-base repeats containing the consensus CopY operators. A.**  
396 Aligned 21-base sequences for the two CopY operators. **B.** TIGR4 *SP\_0727* promoter region  
397 sequence (containing both 21-base repeats) aligned with the *E. hirae* ATCC strain 9790.  
398 Identical bases are underlined for the respective regions containing the operator.

399

400 **Figure 2. CopY *cop* operon operator consensus sequences in the genomic DNA. A.** Top  
401 consensus DNA sequence contained within the 87 unique upstream 100 bases sequences to  
402 the respective CopY organism as detected by MEME suite. The literature-based  
403 T/GACAnnTGTA is underlined within the program generated consensus sequence. **B.** Total  
404 unique DNA sequences from Table S5 listed by number of CopY operators. **C.** Unique genera  
405 with two CopY *cop* operon operators from Tables S5 and S6. **D.** Unique genera with one CopY  
406 operator from Tables S5.

407

408 **Figure 3. CopY binds to both *cop* operon operators.** EMSA with CopY and two-site  
409 (operator) DNA. In seven of eight wells, a final concentration of 50 nM DNA was used with  
410 protein concentrations titrated by 2.5-fold dilutions from 640 nM to 41 nM. A final concentration  
411 of 640 nM CopY was used in a protein-without-DNA control with each replicate.

412

413 **Figure 4. Affinity measurements for CopY and the *cop* operon operators.** DNA fragments  
414 were loaded onto a biosensor and tested with 1000 nM (blue), 500 nM (red), 250 nM (light blue),  
415 125 nM (green), 62.5 nM (orange), 15.6 nM (purple) CopY (A-D). **A.** Two-site **B.** Distal site **C.**  
416 Proximal site **D.** Scram. For each figure, data is representative of at least three experimental  
417 replicates.

418  
419 **Figure 5. Prediction of CopY binding based on 10-base sequence overestimates binding**  
420 **sites.** CopY at 3  $\mu$ M was used to assess binding to DNA fragments containing potential CopY  
421 operators upstream of the respective genes *SP\_0090 1* (red), *SP\_0090 2* (light blue), *SP\_0045*  
422 (green), *SP\_0530* (orange), *SP\_1433* (purple), with controls for two-site (blue), scram (gray), no  
423 DNA (red-orange). For each figure, data is representative of three experimental replicates.

424  
425  
426 **Figure 6. The minimum operator for sufficient CopY binding is 16 bases in length. A.**  
427 Binding of the 10-base fragment compared to positive and negative controls. Two-site (blue),  
428 Two-site no protein (red), 10-base (green), scram (orange), no DNA (purple). **B.** DNA fragments  
429 containing either the upstream (5 bases) or downstream (6 bases) of the 10-base sequence  
430 within 21-base repeat compared to positive and negative controls. Proximal site (blue), five  
431 bases upstream (red), six bases downstream (light blue), 10-base sequence (green). **C.**  
432 Fragments were used to assess extended sequence on both sides of the 10-base sequence.  
433 Proximal site (blue), 14 bases (red), 16 bases (light blue), 10 bases (green), scram (orange), no  
434 DNA (purple). Panels A-C used 3 $\mu$ M CopY to assess binding to each of the fragments. **D.** A  
435 fragment containing 19 of the 21 bases in the repeat has comparable levels of binding to the  
436 fully repeat. The following concentrations were used to establish the  $K_d$ , 1000 nM (blue), 500 nM  
437 (red), 250 nM (light blue), 125 nM (green), 62.5 nM (orange), 15.6 nM (purple) CopY. Data is  
438 representative of three experimental replicates.

439

440 **Figure 7. Pneumococcal CopY binds to *E. hirae* DNA in accordance with the newly**  
441 **proposed consensus *cop* operon operator.** Affinity of CopY binding to various DNA  
442 fragments was determined using the following concentrations of CopY 1000 nM (blue), 500 nM  
443 (red), 250 nM (light blue), 125 nM (green), 62.5 nM (orange), 15.6 nM (purple) (A-D). **A.** *E. hirae*  
444 proximal site. **B.** *E. hirae* distal site **C.** 19-base fragment with a T to C mutation. **D.** 19-base  
445 fragment with a T to A mutation. For each figure, data is representative of three experimental  
446 replicates.

447

448 **Figure 8. Chart representing the previous, newly proposed pneumococcal, and newly**  
449 **proposed CopY/R protein family consensus *cop* operon operator.** Bases that change from  
450 the initial 10-base consensus operator are highlighted in red.

451 REFERENCES

- 452  
453 1. **Irving H, Williams RJP.** 1953. 637. The stability of transition-metal complexes. *Journal*  
454 *of the Chemical Society (Resumed)* doi:10.1039/JR9530003192:3192-3210.  
455 2. **Imlay JA.** The mismetallation of enzymes during oxidative stress.  
456 3. **Braymer JJ, Giedroc DP.** 2014. Recent developments in copper and zinc homeostasis  
457 in bacterial pathogens. *Current opinion in chemical biology* **19**:59-66.  
458 4. **Salgado CD, Sepkowitz KA, John JF, Cantey JR, Attaway HH, Freeman KD, Sharpe**  
459 **PAM, Michels HT, Schmidt MG.** 2013. Copper Surfaces Reduce the Rate of  
460 Healthcare-Acquired Infections in the Intensive Care Unit. *Infection Control and Hospital*  
461 *Epidemiology* **34**:479-486.  
462 5. **Warnes SL, Keevil CW.** 2016. Lack of Involvement of Fenton Chemistry in Death of  
463 Methicillin-Resistant and Methicillin-Sensitive Strains of *Staphylococcus aureus* and  
464 Destruction of Their Genomes on Wet or Dry Copper Alloy Surfaces. *Appl Environ*  
465 *Microbiol* **82**:2132-2136.  
466 6. **Macomber L, Hausinger RP.** 2011. Mechanisms of nickel toxicity in microorganisms.  
467 *Metallomics* **3**:1153-1162.  
468 7. **Kumar V, Mishra RK, Kaur G, Dutta D.** 2017. Cobalt and nickel impair DNA  
469 metabolism by the oxidative stress independent pathway. *Metallomics* **9**:1596-1609.  
470 8. **Kehl-Fie TE, Skaar EP.** 2010. Nutritional immunity beyond iron: a role for manganese  
471 and zinc. *Curr Opin Chem Biol* **14**:218-224.  
472 9. **Hood MI, Skaar EP.** 2012. Nutritional immunity: transition metals at the pathogen-host  
473 interface. *Nat Rev Microbiol* **10**:525-537.  
474 10. **Macomber L, Imlay JA.** 2009. The iron-sulfur clusters of dehydratases are primary  
475 intracellular targets of copper toxicity. *Proc Natl Acad Sci U S A* **106**:8344-8349.  
476 11. **Johnson MD, Kehl-Fie TE, Rosch JW.** 2015. Copper intoxication inhibits aerobic  
477 nucleotide synthesis in *Streptococcus pneumoniae*. *Metallomics* **7**:786-794.  
478 12. **Djoko KY, Phan MD, Peters KM, Walker MJ, Schembri MA, McEwan AG.** 2017.  
479 Interplay between tolerance mechanisms to copper and acid stress in *Escherichia coli*.  
480 *Proc Natl Acad Sci U S A* **114**:6818-6823.  
481 13. **Djoko KY, McEwan AG.** 2013. Antimicrobial action of copper is amplified via inhibition  
482 of heme biosynthesis. *ACS Chem Biol* **8**:2217-2223.  
483 14. **Macomber L, Rensing C, Imlay JA.** 2007. Intracellular copper does not catalyze the  
484 formation of oxidative DNA damage in *Escherichia coli*. *J Bacteriol* **189**:1616-1626.  
485 15. **Miao X, He J, Zhang L, Zhao X, Ge R, He QY, Sun X.** 2018. A Novel Iron Transporter  
486 SPD\_1590 in *Streptococcus pneumoniae* Contributing to Bacterial Virulence Properties.  
487 *Front Microbiol* **9**:1624.  
488 16. **Honsa ES, Johnson MD, Rosch JW.** 2013. The roles of transition metals in the  
489 physiology and pathogenesis of. *Frontiers in cellular and infection microbiology* **3**:92.  
490 17. **Shafeeq S, Yesilkaya H, Kloosterman TG, Narayanan G, Wandel M, Andrew PW,**  
491 **Kuipers OP, Morrissey JA.** 2011. The cop operon is required for copper homeostasis  
492 and contributes to virulence in *Streptococcus pneumoniae*. *Molecular microbiology*  
493 **81**:1255-1270.  
494 18. **Rosch JW, Sublett J, Gao G, Wang YD, Tuomanen EI.** 2008. Calcium efflux is  
495 essential for bacterial survival in the eukaryotic host. *Molecular microbiology* **70**:435-  
496 444.  
497 19. **Rosch JW, Gao G, Ridout G, Wang YD, Tuomanen EI.** 2009. Role of the manganese  
498 efflux system *mntE* for signalling and pathogenesis in *Streptococcus pneumoniae*.  
499 *Molecular microbiology* **72**:12-25.

- 500 20. **Honsa ES, Johnson MDL, Rosch JW.** 2013. The roles of transition metals in the  
501 physiology and pathogenesis of *Streptococcus pneumoniae*. *Frontiers in Cellular and*  
502 *Infection Microbiology* **3**.
- 503 21. **Shafeeq S, Kuipers OP, Kloosterman TG.** 2013. The role of zinc in the interplay  
504 between pathogenic streptococci and their hosts. *Molecular microbiology* **88**:1047-1057.
- 505 22. **Strausak D, Solioz M.** 1997. CopY is a copper-inducible repressor of the *Enterococcus*  
506 *hirae* copper ATPases. *The Journal of biological chemistry* **272**:8932-8936.
- 507 23. **Smaldone GT, Helmann JD.** 2007. CsoR regulates the copper efflux operon copZA in  
508 *Bacillus subtilis*. *Microbiology* **153**:4123-4128.
- 509 24. **Corbett D, Schuler S, Glenn S, Andrew PW, Cavet JS, Roberts IS.** 2011. The  
510 combined actions of the copper-responsive repressor CsoR and copper-  
511 metallochaperone CopZ modulate CopA-mediated copper efflux in the intracellular  
512 pathogen *Listeria monocytogenes*. *Molecular microbiology* **81**:457-472.
- 513 25. **Vollmecke C, Drees SL, Reimann J, Albers SV, Lubben M.** 2012. The ATPases CopA  
514 and CopB both contribute to copper resistance of the thermoacidophilic archaeon  
515 *Sulfolobus solfataricus*. *Microbiology* **158**:1622-1633.
- 516 26. **Jacobs AD, Chang FMJ, Morrison L, Dilger JM, Wysocki VH, Clemmer DE, Giedroc**  
517 **DP.** 2015. Resolution of Stepwise Cooperativities of Copper Binding by the  
518 Homotetrameric Copper-Sensitive Operon Repressor (CsoR): Impact on Structure and  
519 Stability. *Angewandte Chemie-International Edition* **54**:12795-12799.
- 520 27. **Johnson MD, Kehl-Fie TE, Klein R, Kelly J, Burnham C, Mann B, Rosch JW.** 2015.  
521 Role of copper efflux in pneumococcal pathogenesis and resistance to macrophage-  
522 mediated immune clearance. *Infect Immun* **83**:1684-1694.
- 523 28. **Singh K, Senadheera DB, Levesque CM, Cvitkovitch DG.** 2015. The copYAZ Operon  
524 Functions in Copper Efflux, Biofilm Formation, Genetic Transformation, and Stress  
525 Tolerance in *Streptococcus mutans*. *J Bacteriol* **197**:2545-2557.
- 526 29. **Arguello JM, Gonzalez-Guerrero M, Raimunda D.** 2011. Bacterial transition metal  
527 P(1B)-ATPases: transport mechanism and roles in virulence. *Biochemistry* **50**:9940-  
528 9949.
- 529 30. **Hava DL, Camilli A.** 2002. Large-scale identification of serotype 4 *Streptococcus*  
530 *pneumoniae* virulence factors. *Molecular microbiology* **45**:1389-1406.
- 531 31. **Stoyanov JV, Brown NL.** 2003. The *Escherichia coli* copper-responsive copA promoter  
532 is activated by gold. *The Journal of biological chemistry* **278**:1407-1410.
- 533 32. **Neubert MJ, Dahlmann EA, Ambrose A, Johnson MDL.** 2017. Copper Chaperone  
534 CupA and Zinc Control CopY Regulation of the Pneumococcal cop Operon. *Mosphere* **2**.
- 535 33. **Glauninger H, Zhang Y, Higgins KA, Jacobs AD, Martin JE, Fu Y, Coyne Rd HJ,**  
536 **Bruce KE, Maroney MJ, Clemmer DE, Capdevila DA, Giedroc DP.** 2018. Metal-  
537 dependent allosteric activation and inhibition on the same molecular scaffold: the copper  
538 sensor CopY from *Streptococcus pneumoniae*. *Chem Sci* **9**:105-118.
- 539 34. **Liu T, Ramesh A, Ma Z, Ward SK, Zhang LM, George GN, Talaat AM, Sacchettini**  
540 **JC, Giedroc DP.** 2007. CsoR is a novel *Mycobacterium tuberculosis* copper-sensing  
541 transcriptional regulator. *Nature Chemical Biology* **3**:60-68.
- 542 35. **Fu Y, Tsui HC, Bruce KE, Sham LT, Higgins KA, Lisher JP, Kazmierczak KM,**  
543 **Maroney MJ, Dann CE, 3rd, Winkler ME, Giedroc DP.** 2013. A new structural  
544 paradigm in copper resistance in *Streptococcus pneumoniae*. *Nat Chem Biol* **9**:177-183.
- 545 36. **Fu Y, Bruce KE, Wu HW, Giedroc DP.** 2016. The S2 Cu(I) site in CupA from  
546 *Streptococcus pneumoniae* is required for cellular copper resistance. *Metallomics* **8**:61-  
547 70.
- 548 37. **Changela A, Chen K, Xue Y, Holschen J, Outten CE, O'Halloran TV, Mondragon A.**  
549 2003. Molecular basis of metal-ion selectivity and zeptomolar sensitivity by CueR.  
550 *Science* **301**:1383-1387.

- 551 38. **Safo MK, Zhao QX, Ko TP, Musayev FN, Robinson H, Scarsdale N, Wang AHJ,**  
552 **Archer GL.** 2005. Crystal structures of the Blal repressor from *Staphylococcus aureus*  
553 and its complex with DNA: Insights into transcriptional regulation of the bla and mec  
554 operons. *Journal of Bacteriology* **187**:1833-1844.
- 555 39. **Arede P, Oliveira DC.** 2013. Proteolysis of mecA repressor is essential for expression  
556 of methicillin resistance by *Staphylococcus aureus*. *Antimicrob Agents Chemother*  
557 **57**:2001-2002.
- 558 40. **Altschul SF, Gish W, Miller W, Myers EW, Lipman DJ.** 1990. Basic local alignment  
559 search tool. *J Mol Biol* **215**:403-410.
- 560 41. **Stols L, Gu MY, Dieckman L, Raffen R, Collart FR, Donnelly MI.** 2002. A new vector  
561 for high-throughput, ligation-independent cloning encoding a tobacco etch virus protease  
562 cleavage site. *Protein Expression and Purification* **25**:8-15.
- 563 42. **Portmann R, Magnani D, Stoyanov JV, Schmechel A, Multhaup G, Solioz M.** 2004.  
564 Interaction kinetics of the copper-responsive CopY repressor with the cop promoter of  
565 *Enterococcus hirae*. *J Biol Inorg Chem* **9**:396-402.
- 566 43. **Collins TC, Dameron CT.** 2012. Dissecting the dimerization motif of *Enterococcus*  
567 *hirae*'s Zn(II)CopY. *Journal of Biological Inorganic Chemistry* **17**:1063-1070.
- 568 44. **Gupta RS, Lo B, Son J.** 2018. Phylogenomics and Comparative Genomic Studies  
569 Robustly Support Division of the Genus *Mycobacterium* into an Emended Genus  
570 *Mycobacterium* and Four Novel Genera. *Front Microbiol* **9**:67.
- 571 45. **Bailey TL, Johnson J, Grant CE, Noble WS.** 2015. The MEME Suite. *Nucleic Acids*  
572 *Res* **43**:W39-49.
- 573 46. **Bailey TL, Boden M, Buske FA, Frith M, Grant CE, Clementi L, Ren J, Li WW, Noble**  
574 **WS.** 2009. MEME SUITE: tools for motif discovery and searching. *Nucleic Acids Res*  
575 **37**:W202-208.
- 576 47. **Bailey TL, Elkan C.** 1994. Fitting a mixture model by expectation maximization to  
577 discover motifs in biopolymers. *Proc Int Conf Intell Syst Mol Biol* **2**:28-36.
- 578 48. **Magnani D, Barre O, Gerber SD, Solioz M.** 2008. Characterization of the CopR regulon  
579 of *Lactococcus lactis* IL1403. *J Bacteriol* **190**:536-545.
- 580 49. **Mrazek J, Xie S.** 2006. Pattern locator: a new tool for finding local sequence patterns in  
581 genomic DNA sequences. *Bioinformatics* **22**:3099-3100.
- 582 50. **Odermatt A, Solioz M.** 1995. Two trans-acting metalloregulatory proteins controlling  
583 expression of the copper-ATPases of *Enterococcus hirae*. *J Biol Chem* **270**:4349-4354.
- 584 51. **Slager J, Aprianto R, Veening JW.** 2018. Deep genome annotation of the opportunistic  
585 human pathogen *Streptococcus pneumoniae* D39. *Nucleic Acids Res* **46**:9971-9989.
- 586 52. **Gregory PD, Lewis RA, Curnock SP, Dyke KG.** 1997. Studies of the repressor (Blal)  
587 of beta-lactamase synthesis in *Staphylococcus aureus*. *Mol Microbiol* **24**:1025-1037.
- 588 53. **van Opijnen T, Camilli A.** 2012. A fine scale phenotype-genotype virulence map of a  
589 bacterial pathogen. *Genome Res* **22**:2541-2551.
- 590

591 **Table 1**

| Construct                  | $K_d$ (nM)     | $R^2$  |
|----------------------------|----------------|--------|
| Two-Site                   | $28.1 \pm 0.2$ | 0.9474 |
| Distal Site                | $55.2 \pm 0.4$ | 0.9432 |
| Proximal Site              | $25.5 \pm 0.2$ | 0.9475 |
| 16-base                    | $360 \pm 4$    | 0.9808 |
| 19-base                    | $37.1 \pm 0.3$ | 0.9552 |
| 19-base T to C             | $40.4 \pm 0.3$ | 0.9408 |
| <i>E. hiraе</i> (Proximal) | $164 \pm 2$    | 0.9269 |

592



593 **Table 2**

| Organism                        | Closest Downstream Gene     | Sequence                              | CopY/R Binding | Reference            |
|---------------------------------|-----------------------------|---------------------------------------|----------------|----------------------|
| <i>Lactococcus lactis</i>       | <i>ytjD1</i>                | AAATAGTT <b>TACA</b> AGTGTAAATTTATTT  | Yes            | Magnani et al., 2008 |
|                                 | <i>ydiD</i>                 | AAAATGTT <b>TACA</b> TGTGTAAATTTTCAC  | Yes            | Magnani et al., 2008 |
|                                 | <i>copR</i>                 | TTAGTGTT <b>TACA</b> CGTGTAAACTTATCT  | Yes            | Magnani et al., 2008 |
|                                 | <i>copB</i>                 | TGATAGTT <b>TACA</b> ATGTAAACTATATA   | Yes            | Magnani et al., 2008 |
|                                 | <i>yahC</i>                 | TTTTCGTT <b>TACA</b> ATGTAAACATAGAA   | Yes            | Magnani et al., 2008 |
|                                 | <i>lctO</i>                 | CTATCATC <b>TACA</b> GATGTAAACTTTATA  | Yes            | Magnani et al., 2008 |
|                                 | <i>ytjD2</i>                | GATAAGAT <b>TACA</b> TATGTAAACAATAAA  | Yes            | Magnani et al., 2008 |
|                                 | <i>yfhF</i>                 | TAAGTATA <b>TACA</b> TCTGTAAACTGAAA   | No             | Magnani et al., 2008 |
|                                 | <i>yxdE</i>                 | TTTGCTAT <b>TACA</b> CTGTATCACATAAA   | No             | Magnani et al., 2008 |
| <i>Streptococcus pneumoniae</i> | <i>SP_0090 1</i>            | TGATTTAG <b>GACA</b> TTTGTTTGATAGTGG  | No             | This Study           |
|                                 | <i>SP_0090 2</i>            | GAGTATAC <b>TAA</b> TAAATGTAATCGTTATC | No             | This Study           |
|                                 | <i>SP_0045</i>              | GGTGAAC <b>TACA</b> GATGTTACGAAATT    | No             | This Study           |
|                                 | <i>SP_0530</i>              | ATTTGAGG <b>AACA</b> AATGTACGTTTATAA  | No             | This Study           |
|                                 | <i>SP_1433</i>              | GTAATTAT <b>AACA</b> GATGTATAATAGAAA  | No             | This Study           |
|                                 | <i>SP_1863</i>              | ATGAATAA <b>AACA</b> ATGTAAACTCATC    | No             | This Study           |
|                                 | <i>SP_2073</i>              | AAGGCGGA <b>AACA</b> TGTTCAATGACTTG   | No             | This Study           |
|                                 | <i>copY</i> (Proximal Site) | GTGTAATT <b>GACA</b> AATGTAGATTTTGGGA | Yes            | This Study           |
|                                 | <i>copY</i> (Distal Site)   | CTATAATT <b>GACA</b> AATGTAGATTTTAAG  | Yes            | This Study           |

594

595 **Figure 1**

**A.** TIGR4 CopY Operators

Site 2 <sup>-33</sup> TAATTGACAAATGTAGATTTT<sup>-13</sup>  
Site 1 <sup>-13</sup> TAATTGACAAATGTAGATTTT<sup>-53</sup>

**B.**

*E. hirae* ATCC 9790 -66 AAATTTTCGATTACAGTTGTAACTAT-----TATCGAAGTTAAGTTTACAAATGTAATCGATGGAGGTGAAAAACCA  
*S. pneumoniae* TIGR4 -73 TAATTGACAAATGTAGATTTTAAGAGTATACTGATGAGTGTAAATTGACAAATGTAGATTTTGGAGGT

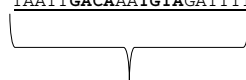

Site 1  
Distal

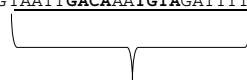

Site 2  
Proximal

596

597 **Figure 2**

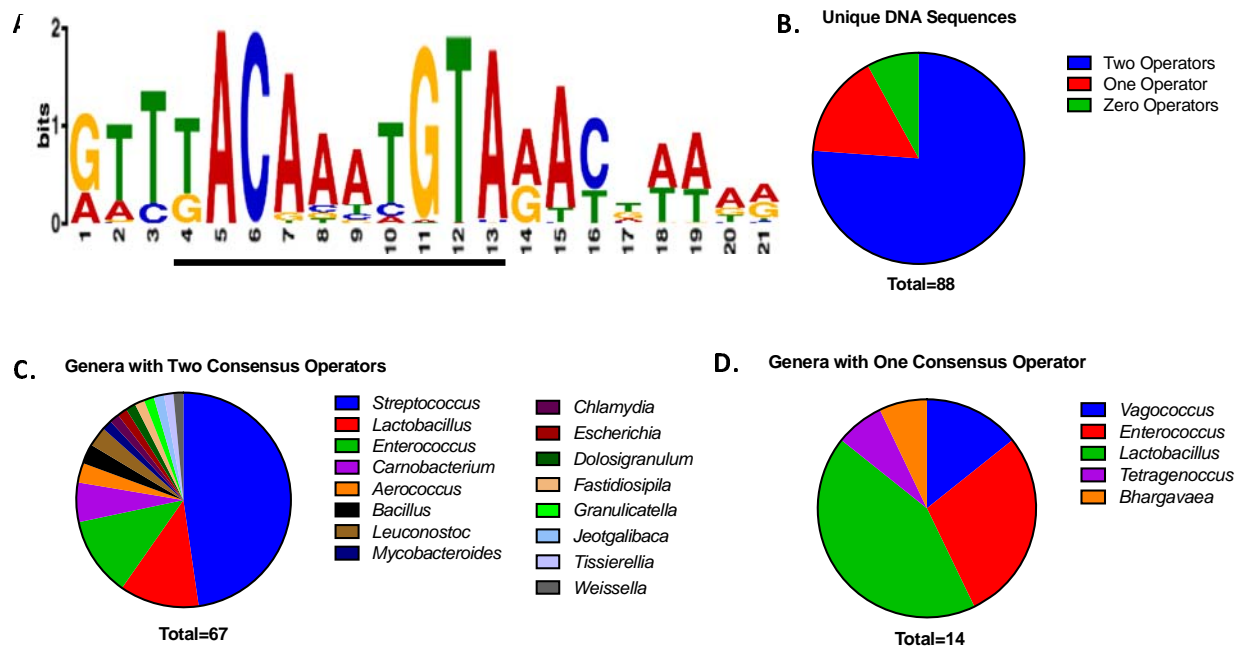

598

599 **Figure 3**

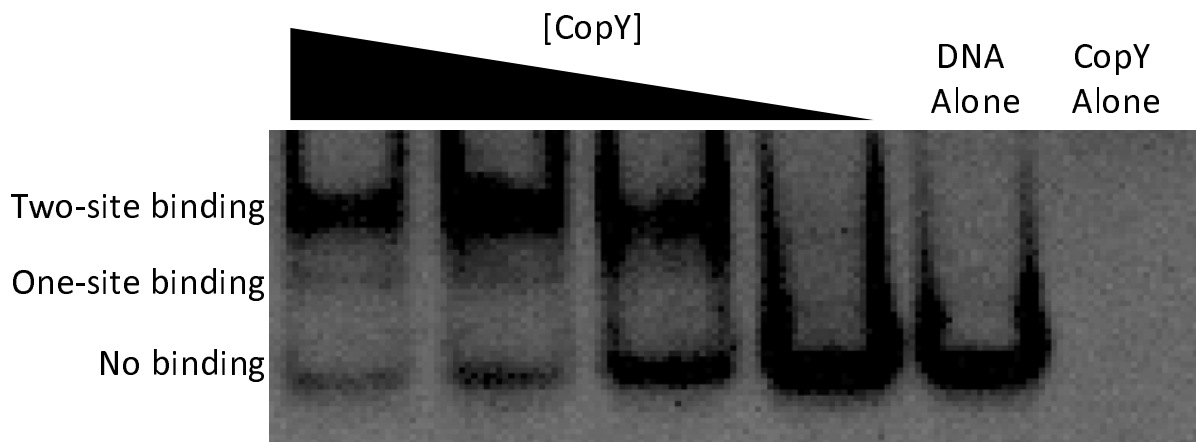

600

601 **Figure 4**

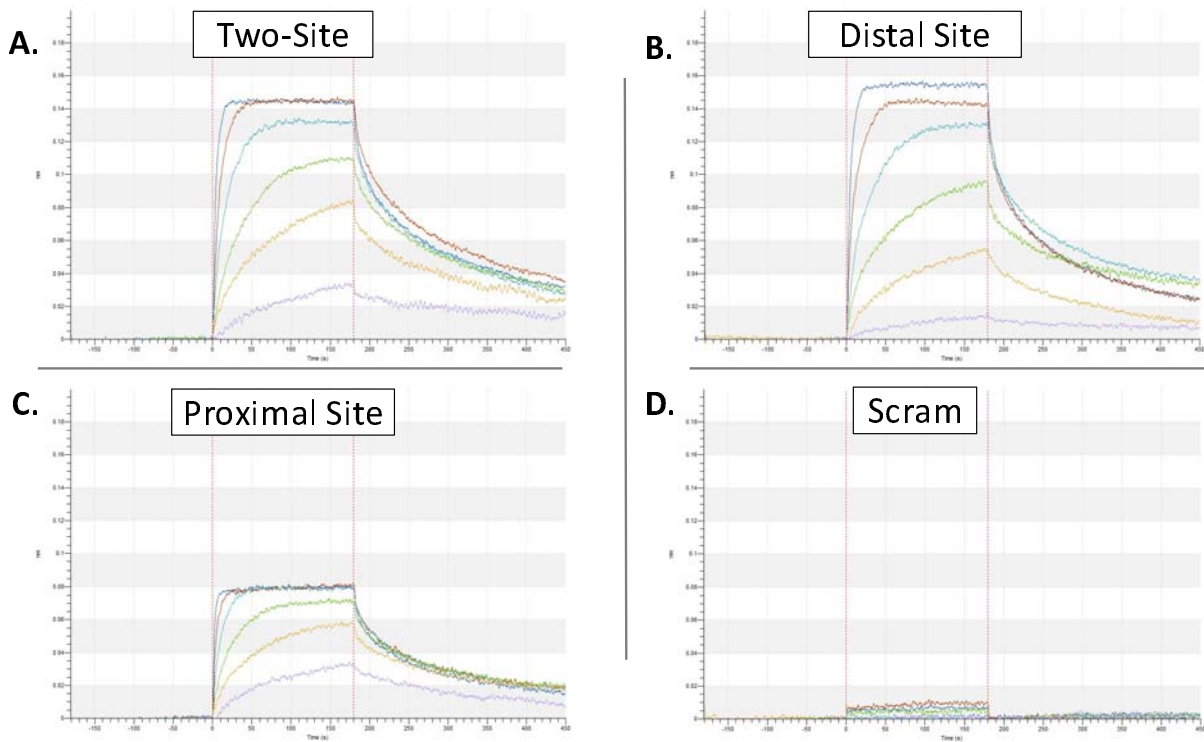

602

603 **Figure 5**

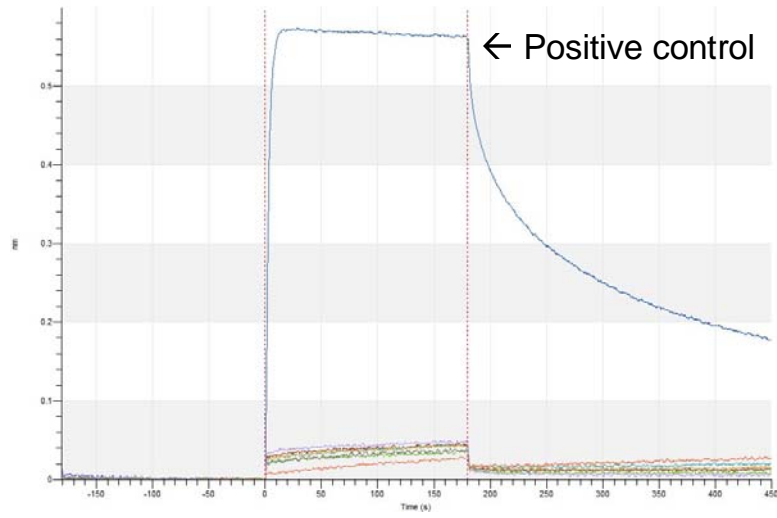

604

605 **Figure 6**

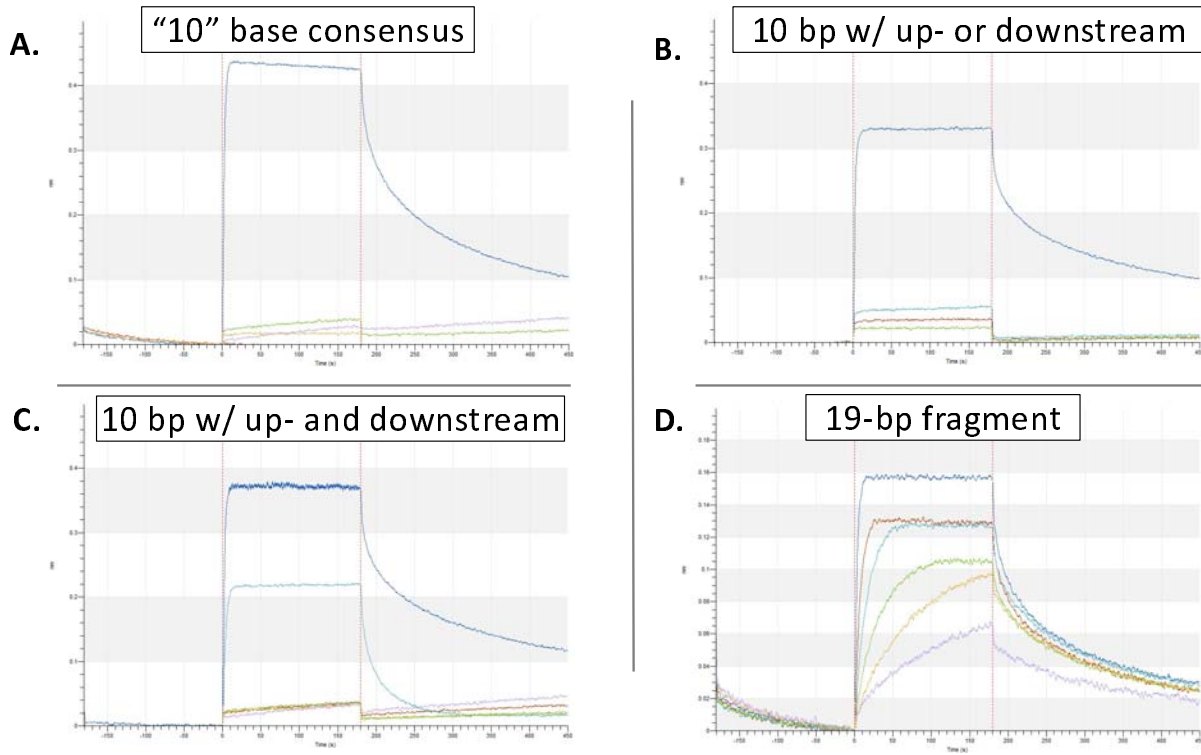

606

607 **Figure 7**

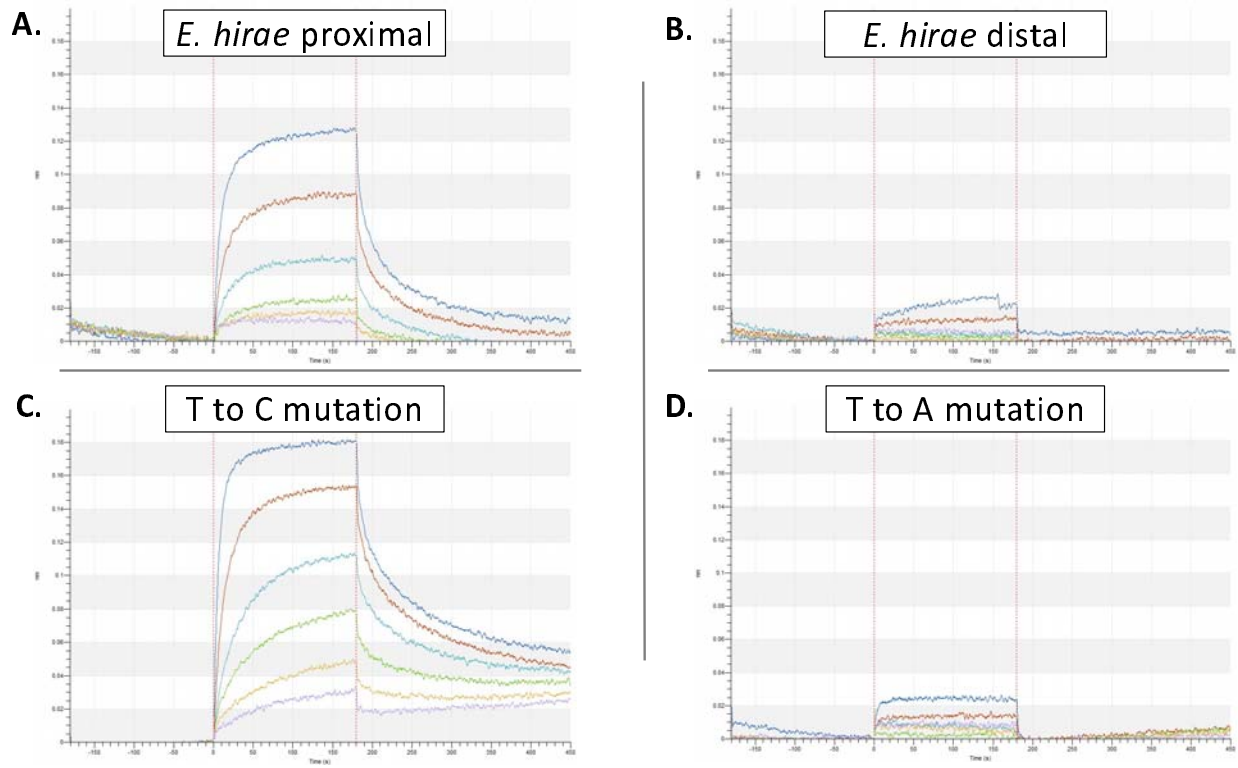

608



609 **Figure 8**

|                      |                  |
|----------------------|------------------|
| Previous Consensus   | nnnKACAnnTGTAnnn |
| <i>S. pneumoniae</i> | RnYKACAATGTARnY  |
| New Total Consensus  | RnYKACAnnYGTARnY |

610
